# Supplementary material for: Drug Repurposing using consilience of Knowledge Graph Completion methods
Source: PubMed Central journal article supplement (PMC11326126; doi:10.1101/2023.05.12.540594), 2024-08-10
Supplement: media-1.pdf [file media-1.pdf]

## Supporting Information

**S1 Fig.** Describes the composition of nodes and edges in the MIND dataset as a whole. Upper: Heatmap of node type to node type counts. The y-axis and the x-axis correspond to the head and tail node respectively. Lower: Heatmap of Node type (both head and tail) to relation type counts; Heatmap colors are in exponential scale where darker signifies more and lighter less, respectively. Parentheses highlight the node type and relation type counts.

**S1 Table.** Scoring Functions for Knowledge Graph Embedding Algorithms.

| Algorithm | Score Function                  |
|-----------|---------------------------------|
| TransE    | $-  n_1 + r - n_2  $            |
| DistMult  | $\langle n_1, r, n_2 \rangle$   |
| ComplEx   | $Re\langle n_1, r, n_2 \rangle$ |
| RotatE    | $-  n_1 \odot r - n_2  $        |

The angle brackets in DistMult and ComplEx denote a trilinear dot product.  $\odot$  denotes the Hadamard product (element wise product) between the  $n_1$  and  $r$  embeddings. In brief, TransE, short for Translation Embedding, was developed in 2013 by Bordes et al., aimed to model relationships as translations in embedding space; where  $n_2$  should be close to the embedding of  $h$  when added to a vector,  $r$  [?]. DistMult, modeled relationships using a bilinear diagonal matrix and trilinear dot product as a scoring function [?]. ComplEx modified the DistMult model by embedding additional complex vector components but maintained the trilinear dot product as a scoring function [?]. Finally, RotatE modeled each relation as an element-wise rotation in complex vector spaces [?].

**S1 File.** Curation result of the Union ensemble approach. 25 randomly selected non-indication predictions were manually curated through a literature search for the union ensemble approach and each of its parts. Each compound was classified as having a "Positive", "Neutral", or "Negative" effect on the predicted disease based on criteria outlined in the methods. In total, 200 predictions were made. The results are summarized in Table ??.

**S2 Table.** KGE approaches Optuna optimization hyperparameter results.

| Algorithm | Optimized MRR | Batch Size | Hidden Dimension Size | Negative Sample Size | Learning rate |
|-----------|---------------|------------|-----------------------|----------------------|---------------|
| TransE    | 0.054154      | 248        | 225                   | 124                  | 0.002098      |
| DistMult  | 0.021927      | 212        | 300                   | 88                   | 0.000816      |
| ComplEx   | 0.032595      | 252        | 250                   | 84                   | 0.000292      |
| RotatE    | 0.068594      | 240        | 100                   | 96                   | 0.002329      |

**S3 Table. CBR approaches Optuna optimization hyperparameter results.**

| Algorithm | Optimized MRR       | Max Num Programs | Max Path Length | Max Branch | K Adj | Number of Paths Collected | Linkage |
|-----------|---------------------|------------------|-----------------|------------|-------|---------------------------|---------|
| CBR       | 0.09672434757569749 | 25               | 3               | 100        | 10    | 1000                      | 0       |
| probCBR   | 0.20301439879421163 | 1000             | 3               | 100        | 5     | 1000                      | 0       |

**S4 Table. Kruskal-Wallis Test statistic and p-values of various ensemble lengths for each ensemble method.**

| Ensemble group | Indication group    | statistic     | p-value    |
|----------------|---------------------|---------------|------------|
| Intersection   | Positive & Negative | 281752298.0   | 0.0        |
| Intersection   | Positive            | 134.8568      | 2.2155e-27 |
| Intersection   | Negative            | 3465.5996     | 0.0        |
| Union          | Positive & Negative | 1351570.3371  | 0.0        |
| Union          | Positive            | 3210.1153     | 0.0        |
| Union          | Negative            | 1053174.30321 | 0.0        |

We report the Kruskal-Wallis test statistic value as well as the corresponding p-value for three groups: Positive, Negative, and Both. The Positive, Negative, and Both groups conduct the Kruskal-Wallis test on algorithm lengths 2 - 7 and only on approved indications, non-indications, and both approved and non-indications, respectively. Kruskal-Wallis H-Test compares the median of non-parametric distributions to identify if there is a statistically significant difference between the provided distributions. A low p-value suggests that at least one of the distributions is different from the others. .

**S5 Table. Mann-Whitney U-Test statistic and p-values of various ensemble lengths for each ensemble method.**

| length | Intersection |             | Union          |         |
|--------|--------------|-------------|----------------|---------|
|        | statistic    | p-value     | statistic      | p-value |
| 2      | 24670494.5   | 0.0         | 13638459952.0  | 0.0     |
| 3      | 281752298.0  | 0.0         | 145208921890.5 | 0.0     |
| 4      | 102138952.5  | 0.0         | 262928904076.0 | 0.0     |
| 5      | 13011720.0   | 0.0         | 128163422278.0 | 0.0     |
| 6      | 524477.5     | 3.5930e-127 | 17175072890.5  | 0.0     |
| 7      | 5063.0       | 5.2950e-17  | 407357083.0    | 0.0     |

We report the Mann-Whitney U-Test statistic value as well as the corresponding p-value for all six pairs of positive (approved indications) and negative (non-indications) distributions for both the intersection and union ensemble approaches. Mann-Whitney U-Test is a non-parametric method to compare whether two distributions are the same by randomly selecting X and Y from each distribution and measuring if the probability of  $X > Y$  is the same as  $Y > X$ . A low p-value suggests that the probability of  $X > Y$  is not the same as the probability of  $Y > X$ .

**S6 Table.** Sotalol hydrochloride's respective predicted rank for each link prediction method.

| Algorithm | Hypertension Rank |
|-----------|-------------------|
| CBR       | 3                 |
| probCBR   | 3                 |
| Rephetio  | 1                 |
| TransE    | 28                |
| DistMult  | 86                |
| ComplEx   | 27                |
| RotatE    | 1                 |
